# Supplementary material for: Gas–liquid and gas–liquid–solid catalysis in a mesh microreactor
Source: Royal Society of Chemistry journal article supplement (doi:10.1039/b312290e), 2004-01-01
Supplement: b312290e.doc [file b312290e.doc]

Supplementary Informations for:

# Gas-liquid and gas-liquid-solid catalysis in a mesh microreactor

Radwan Abdallah,a Valérie Meille, a John Shaw,b David Wennb and Claude de Bellefon*a

## Literature data for Table 1

**Table 1** Screening of 20 chiral diphosphine ligands for the hydrogenation of Z-methylacetamidocinamate (mac).

| Entry | Chiral ligand | Operationa | Conv. | ee | Conv., time, [mac], PH2, T°C, [Rh]  lit. b | ee  lit. b | Ref. |
| --- | --- | --- | --- | --- | --- | --- | --- |
| 1a | (R,R)-DIOP | Flow | >98 | 61 | 100%, 1 min, 0,07 M, 1 bar, 25°C, 0.0007 M | 67 | A |
| 1b | (R,R)-DIOP | Batch | >96 | 62 |  |  |  |
| 2 | [Rh((R)-Binap)(COD)]+ | Flow | 54 | 62 | 98%, 48 h, 0.03M, 3-4 bar, RT°C, 0.006 M | 93 | B |
| 3 | (R,S)-Cy-Cy-Josiphos | Flow | 41 | 70 |  |  |  |
| 4a | (R,R)-Me-Duphos | Flow | 31 | >98 | 100%, 1-2 h, 0.3 M, 2 bar, 20-25°C, 0.0003 M | 98 | E |
| 4b | (R,R)-Me-Duphos | Batch | 76 | 95 |  |  |  |
| 5 | (R,S)-Josiphos | Flow | 35 | 87 | 100%, 20 min, 0.2 M, 1 bar, 35°C, 0.002 M | 96 | D |
| 6 | (S,S)-BPPM | Flow | 32 | 89 | 100%, 1 min, 0,07 M, 1 bar, 25°C, 0.0007 M | 93 | A |
| 7 | (R,S)-Cy-Ph-Josiphos | Flow | 9 | 59 |  |  |  |
| 8 | (R)-Prophos | Flow | 9 | 81 |  |  |  |
| 9 | (R,S)-Ph-tBu-Josiphos | Flow | 5 | 31 |  |  |  |
| 10 | (R,R)-Trost ligand | Flow | <1 | n.d. |  |  |  |
| 11 | (S,S)-BDPP | Batch | 79 | 71 |  |  |  |
| 12 | Carbophos | Batch | 61 | 80 |  |  |  |
| 13 | (R,R)-Me-BPE | Batch | 53 | 87 | 100%, 1-2 h, 0.3 M, 2 bar, 20-25°C, 0.0003 M | 85 | E |
| 14 | (R,R)-Et-Duphos | Batch | 45 | 87 | 100%, 1-2 h, 0.3 M, 2 bar, 20-25°C, 0.0003 M | 99 | E |
| 15 | [Rh((R,R)-Dipamp)(COD)]+ | Batch | 34 | -63 | 43%, 30 min, 0.1 M, 3 bar, 25°C, 0.0001 M  Computed from the published kinetic data | -92 | C |
| 16 | (R,R)-Et-BPE | Batch | 25 | 84 | 100%, 1-2 h, 0.3 M, 2 bar, 20-25°C, 0.0003 M | 93 | E |
| 17 | (S,S)-Chiraphos | Batch | 12 | 84 |  |  |  |
| 18 | (S)-NMDPP | Batch | 11 | 60 |  |  |  |
| 19 | (R,R)-Norphos | Batch | 10 | -51 |  |  |  |
| 20 | (R)-Quinap | Batch | <4 | -37 |  |  |  |

*a* Flow and Batch modes see text. Reaction conditions see Fig. 3. b For literature data see Electronic Supplementary Informations.

## (conditions for this work: 1 or 30 min, [mac] 0.1 M, 2-3 bar H2, 20-40°C, [Rh] 0.0001 M)

1. Oehme, E. Paetzold, R. Selke J. Mol. Cat. 1992, 71, L1
2. A Miyashita, A Yasuda, H Taaya, Toriumi, T Ito, T Souchi, R Noyori J. Am. Chem. Soc., 1980, 120, 7932. Note here that the substrate is not the Methyl-acetamidocinamate but the Methyl-benzamidocinamate.
3. Landis, C. R. and J. Halpern J. Am. Chem. Soc. 1987, 109(6): 1746-1754.
4. A. Togni, C. Breutel, A. Schnyder, F. Spindler, H. Landert, A. Tijani J. Am. Chem. Soc. 1994, 116, 4062.
5. Burk, M. J. J. Am. Chem. Soc. 1991, 113, 8518.

## Comparison with batch experiments for the gas-liquid-solid experiments

The activity measured in the micro-contactor was compared to that measured in a classical stirred-tank semi-batch reactor (open to gas inlet). In the batch reactor, 4 g of -methylstyrene are diluted in 56 mL methylcyclohexane. In this case, the glass insert is just hold by a grid maintained above the magnetic stirrer. The following pressure were used: Pt : 0.21MPa, Pd : 0.29MPa. The activities (a in mol/s) obtained with the Pt insert in the microcontactor are similar to that observed in batch conditions. The activation energy (around 50kJ/mol) measured in the microcontactor is also similar to what is known from the literature, demonstrating that the chemical regime is reached (see Arrhenius plot).

On the contrary, for the Pd insert, the activation energy is close to zero. The activity of this catalyst is too high and mass transfer is limiting, even in the batch reactor.

**Typical test for the gas-liquid-solid hydrogenation of -methystyrene**

The glass inserts coated with a gamma-alumina layer of 10 µm thick were received from the University of Limerick. It is impregnated with a solution of palladium or platinum acetylacetonate in toluene, dried at 100°C, calcinated and reduced under hydrogen. The so prepared glass insert is then mounted in the mesh microcontactor using Viton gaskets. For catalytic tests, methylcyclohexane is continuously flowing through the mesh microcontactor at a constant flow rate of 0.1 cm3/min. Pulses of a solution of α-methylstyrene (13 mg) in methycyclohexane are then injected using a Rheodyne (7725) injection valve equipped with a 100µl loop. This valve is connected to a Gilson HPLC type liquid pump. The product is collected at the outlet of the mesh microcontactor for 10 minutes. The outlet composition was determined by gas chromatography on a HP-6890 apparatus equipped with a FID detetector using a BP20 column (PEG, 25 m, 0.33 mm, 0.5 µm) with the following parameters: 70°C, 5min then 3°C/min to 100°C. retention times are 7.6 min for cumene and 13.3 min for α-methylstyrene.

## Measurements of the activation energy of a commercial Pt on alumina catalyst for the G-L-S hydrogenation

The experimental protocol used here is the same that in ref. 11a and 11b. An activation energy of 39 kJ/mol is determined (see figure).

**Asymmetric G/L hydrogenations :**

A solution of metal precursor [Rh(COD)]BF4  (0.0012 mol.l-1) in MeOH (3.7 ml) was added to a Schlenk containing the exact mass of the diphosphine to adjust the ratio metal:ligand (1:1) and the mixture is leaft for ca. 15 min under stirring at room temperature (28°C). A solution of Z-methylacetamidocinamate(mac) (0.55 ml, 0.8 mol.l-1) is then added. The total volume is 4.25 ml and the final concentration is 0.001 mol.l-1 for the catalyst and 0.1 mol.l-1 for the mac. The so prepared solution was charged in the 0.1 ml loop of the Rheodyne (7725) injection valve. This valve is connected to a Gilson liquid pump ensuring a 0.1 ml/min flow rate of MeOH. After injection, the reacting pulse is drawn into the mesh microcontactor and collected for 10 minutes in a 2 ml chromatography vials at the out of the micro-reactor. For the batch test the Gilson pump is turned off for 30 minutes after the reacting pulse is introduced in the cavity of the mesh microcontactor. The pump is turned on again for sample collection. Samples were analysed by gas chromatography on an HP-6890 apparatus equiped with a Chirasilval column ( 25m, 0.16µm, d= 0.25mm, 6.5 cm3/min He, FID detector, split injection mode, 1 µl, 165°C, 12 min.

**Chemicals:**

[Rh(COD)]BF4 : Bis(1,5-cyclooctadiene)rhodium(I)tetrafluoroborate hydrate [207124-65-0] supplied by Aldrich.

| **Entry** | **Abreviation** | **Nomenclature** | **CAS registry numbers** | **Supplied by** |
| --- | --- | --- | --- | --- |
| 1 | (R,R)-DIOP | (4R,5R)-(-)-O-Isopropylidene-2,3-dihydroxy-1,4-bis(diphenylphosphino)butane | 32305-98-9 | STREM |
| 2 | [(R)-Rh-(BINAP)(COD)]+ | ((R)-(+)-2,2'-bis(diphenylphosphino)-1,1'-binaphtyl)(1,5-cyclooctadiene)rhodium(I) perchlorate: tetrahydrofurancomplex (1:1) | 149368-07-0 | Aldrich |
| 3 | (R, S)cycy-Josiphos | (R)-(-)-1-[(S)-2-(Dicyclohexylphosphino)-ferrocenyl]ethyldicyclohexylphosphine | 167416-28-6 | STREM |
| 4 | (R,R)-Me-DUPHOS | (-)-1,2-bis((2R,5R)-2,5-dimethylphospholano)benzene | 147253-67-6 | STREM |
| 5 | (R)-(S)-JOSIPHOS | (R)-(-)-1-[(S)-2-(diphenylphosphino)-ferrocenyl]ethyldi-cyclohexylphosphine | 155806-35-2 | STREM |
| 6 | (S, S)-BPPM | (-)-(2S,4S)-2-diphenylphosphinomethyl-4-diphenylphosphino-1-t-butoxycarbonylpyrrolidine | 61478-28-2 | STREM |
| 7 | (R, S)cyph-Josiphos | (R)-(-)-1-[(S)-2-(Dicyclohexylphosphino)-ferrocenyl]ethyldiphenylphosphine | 158923-09-2 | STREM |
| 8 | (R)-PROPHOS | R-(+)-1,2-bis(diphenylphosphino)propane | 67884-32-6 | STREM |
| 9 | (R, S)PhtBu-Josiphos | (R)-(-)-1-[(S)-2-(Diphenylphosphino)-ferrocenyl]ethyldi-t-butylphosphine | 155830-69-6 | STREM |
| 10 | (R, R)-TROST LIGAND | (1R,2R)-(+)-1,2-diaminocyclohexane-N,N’-bis(diphenylphosphinobenzoyl) | 138517-61-0 | STREM |
| 11 | (S, S)-BDPP | (2S,4S)-(-)-2,4-bis-(diphenylphosphino)pentane | 77876-39-2 | STREM |
| 12 | CARBOPHOS | Methyl α-D-glucopyranoside-2,6-dibenzoate-3,4-di(bis(3,5-dimethylphenyl)phosphinite) | 158214-06-3 | STREM |
| 13 | (R,R)-Me-BPE | (+)-1,2-bis((2R,5R)-2,5-dimethylphospholano)ethane | 129648-07-3 | STREM |
| 14 | (R,R)-Et-DUPHOS | (-)-1,2-bis((2R,5R)-2,5-diethylphospholano)benzene | 136705-64-1 | STREM |
| 15 | (R, R)-Rh-DiPAMP | (R,R)-(-)-1,2-Bis[(o-methoxy-phenyl)(phenyl)phosphino]ethane(1,5-cyclooctadiene)rhodium(I) tetrafluoroborate | 56977-92-5 | STREM |
| 16 | (R,R)-Et-BPE | (+)-1,2-bis((2R,5R)-2,5-diethylphospholano)ethane | 136705-62-9 | STREM |
| 17 | (S,S)-CHIRAPHOS | (2S,3S)-(-)-bis(diphenylphosphino)butane | 64896-28-2 | STREM |
| 18 | (S)-NMDPP | (S)-(+)-neomenthyldiphenylphosphine | 43077-29-8 | STREM |
| 19 | (R,R)-NORPHOS | (2R,3R)-(-)-2,3-bis(diphenylphosphino)-bicyclo[2.2.1]hept-5-ene | 71042-54-1 | STREM |
| 20 | (R)-QUINAP | (R)-(+)-1-(2-diphenylphosphino-1-naphthyl)isoquinoline | 149341-34-4 | STREM |
